# Supplementary material for: Rational design of photo-responsive supramolecular nanostructures based on an azobenzene-derived surfactant-encapsulated polyoxometalate complex
Source: Royal Society of Chemistry journal article supplement (doi:10.1039/c5ra27351j), 2016-01-01
Supplement: c5ra27351j1.pdf [file c5ra27351j1.pdf]

**Rational Design of Photo-responsive Supramolecular Nanostructures  
based on Azobenzene-derived Surfactant-encapsulated  
Polyoxometalate Complex**

Yongxian Guo,<sup>a</sup> Yanjun Gong,<sup>a</sup> Zhidan Yu,<sup>b</sup> Yan'an Gao,<sup>c</sup> Li Yu<sup>a\*</sup>

<sup>a</sup>Key Laboratory of Colloid and Interface Chemistry, Shandong University, Ministry of Education,  
Jinan 250100, P. R. China

<sup>b</sup>School of Life Science, Shandong University, Jinan 250100, P. R. China

<sup>c</sup>China Ionic Liquid Laboratory, Dalian Institute of Chemical Physics, Chinese Academy of  
Sciences, Dalian 116023, P. R. China

**Supplementary Information**

**Table of Contents**

|                                     |   |
|-------------------------------------|---|
| <b>Supporting Information</b> ..... | 1 |
| Fig. S1 .....                       | 2 |
| Fig. S2 .....                       | 3 |
| Fig. S3 .....                       | 4 |
| Fig. S4 .....                       | 5 |

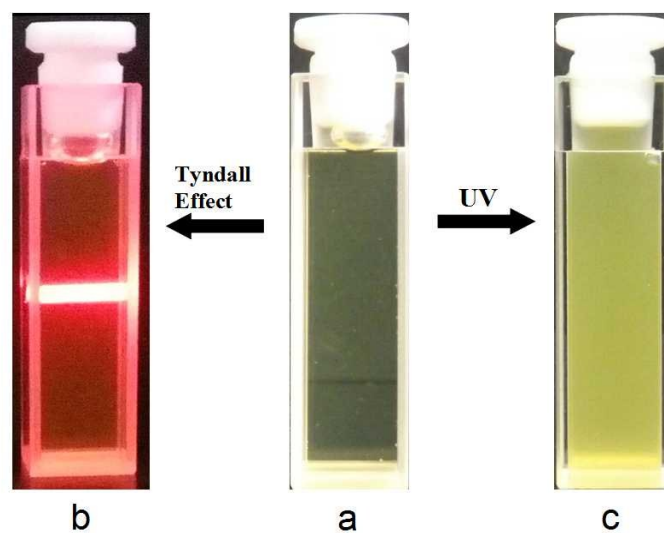

**Fig. S1** Digital pictures of ETAB-POM hybrid solutions fabricated in visible light (a) and its typical Tyndall effect irradiated by a red laser light (b), and upon UV light irradiation (c).

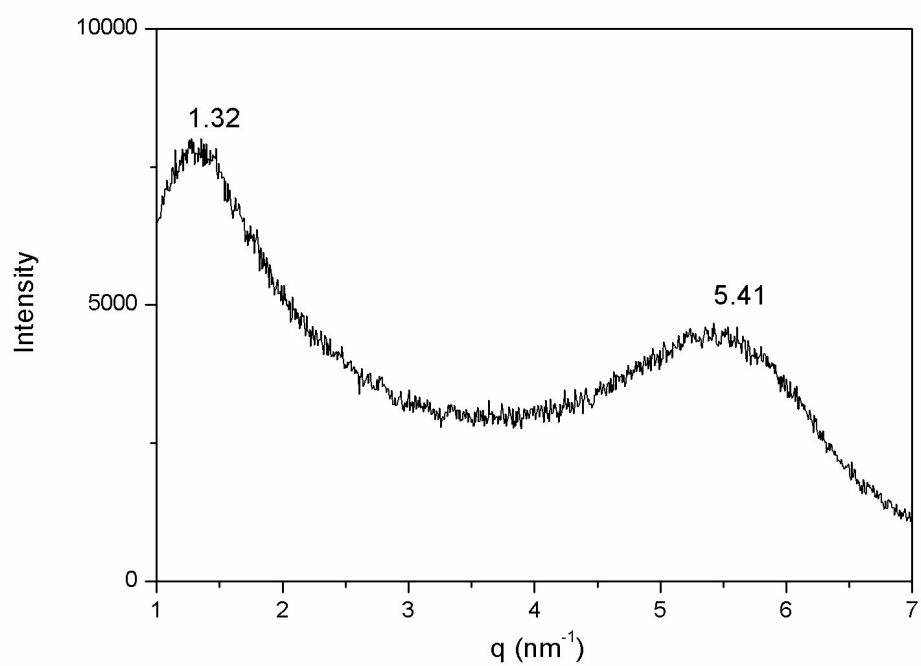

**Fig. S2** The small angle X-ray scattering (SAXS) diffractogram of the ETAB-POM solid hybrid materials.

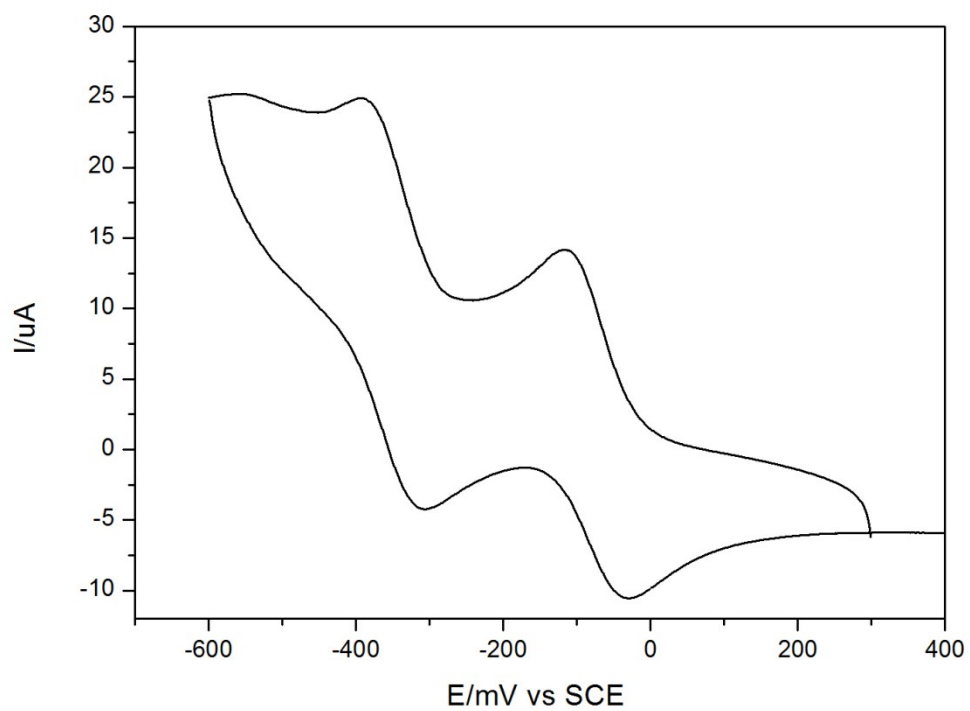

**Fig. S3** The CV curve of individual POM aqueous solution vs. saturated calomel electrode (SCE) in 0.01 M H<sub>2</sub>SO<sub>4</sub> solution. Scan rate: 50 mV/s.

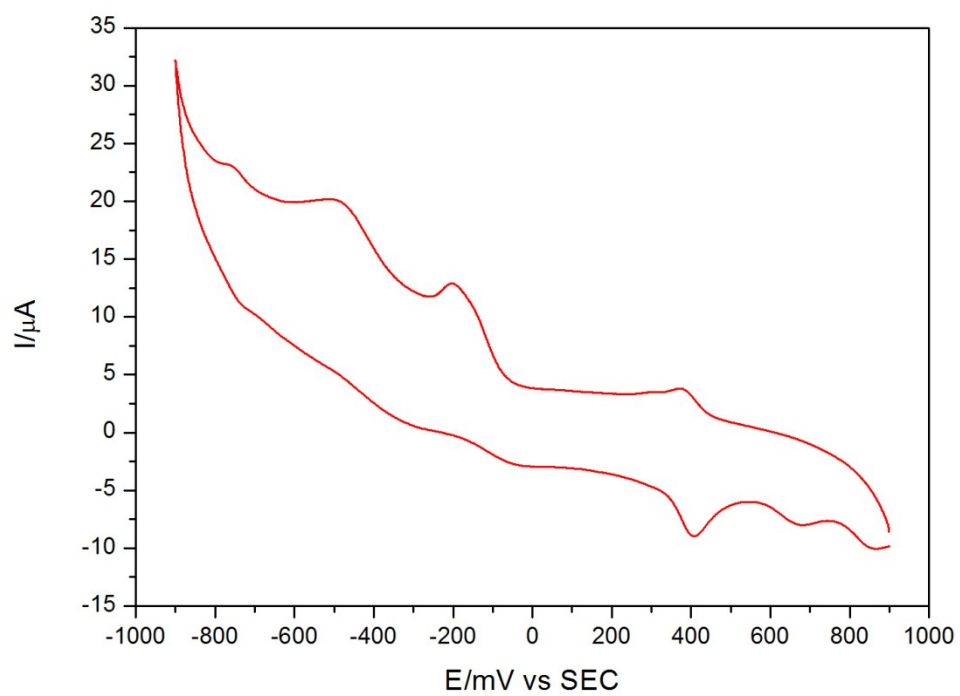

**Fig. S4** The CV curve of the ETAB-POM SEs vs. saturated calomel electrode (SCE) in 0.01 M H<sub>2</sub>SO<sub>4</sub> solution. Scan rate: 50 mV/s.
